# Supplementary material for: A hot-spot-active magnetic graphene oxide substrate for microRNA detection based on cascaded chemiluminescence resonance energy transfer
Source: Royal Society of Chemistry journal article supplement (doi:10.1039/c4nr06603k), 2015-01-01
Supplement: c4nr06603k1.pdf [file c4nr06603k1.pdf]

1 Electronic Supplementary Information for

2 **Hot-spot-active magnetic graphene oxide substrate**  
3 **for microRNA detection based on cascaded**  
4 **chemiluminescence resonance energy transfer**

5

6 SaiBi,<sup>a\*</sup> Min Chen,<sup>b</sup> XiaoqiangJia<sup>b</sup> and Ying Dong<sup>b</sup>

7

8 <sup>a</sup> Laboratory of Fiber Materials and Modern Textiles, the Growing Base for State KeyLaboratory,  
9 Shandong Sino-Japanese Center for Collaborative Research of Carbon Nanomaterials,  
10 Collaborative Innovation Center for Marine Biomass Fiber Materials andTextiles, Qingdao  
11 University, Qingdao 266071, P.R.China

12 <sup>b</sup> Key Laboratory of Sensor Analysis of Tumor Marker, Ministry of Education, College  
13 ofChemistry and Molecular Engineering, Qingdao University of Science and Technology,  
14 Qingdao 266042, P.R.China

15 \*Corresponding author. Tel./Fax: +86-0532-85950873; E-mail address: bisai11@126.com (S. Bi).

16

1 **TableS1. Sequences of RNA and DNA used in this study**

| Name       | Sequence (5'-3')                                        | Modification                   |
|------------|---------------------------------------------------------|--------------------------------|
| miR-122    | UGGAGUGUGACAAUGGUGUUUG                                  |                                |
| miR-let-7a | UGAGGUAGUAGGUUGUAUAGUU                                  |                                |
| miR-let-7b | UGAGGUAGUAGGUUGUGUGGUU                                  |                                |
| I-1        | CCGAGCCAAACACCATTGTCACACTCCAGCTCGGGGGTAGGGCGGGTTGG<br>G | 5'-amino group, 3'-fluorescein |
| I-1'       | CCGAGCCAAACACCATTGTCACACTCCAGCTCGGGGGTAGGGCGGGTTGG<br>G |                                |
| II-1       | CCGAGCCTACAAACACCATGCTCGGGGGTAGGGCGGGTTGGG              | 5'-amino group, 3'-fluorescein |
| II-2       | GTGACAATGGTGTGTTGTAG                                    |                                |
| II-3       | CTACAAACACCATTGTCACACTCCA                               |                                |
| III-1      | GGGTAGGGCGGGTTGGGCCTCCAGAGAGAGAGAGAGAGGGAGG             | 5'-fluorescein, 3'-amino group |
| III-2      | TCTCTCTCGTGACAATGGTGTGTTGTAGCTCTCTCT                    |                                |
| III-3      | CTACAAACACCATTGTCACACTCCA                               |                                |

2

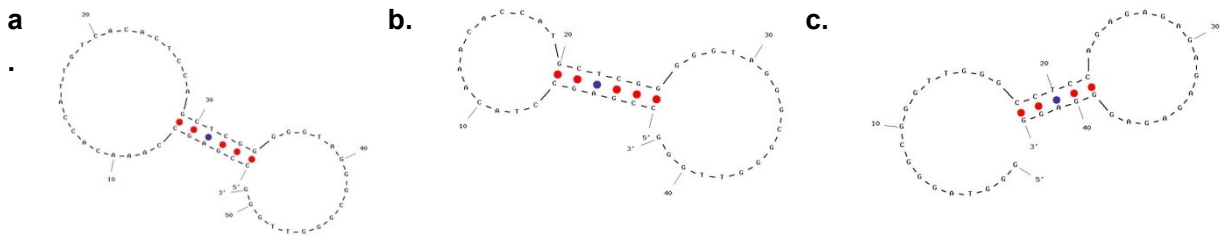

3 **Fig. S1.** The secondary structures of (a) I-1 (I-1'), (b) II-1 and (c) III-1 that were predicted using  
4 the OligoAnalyzer Tool of IDT ([www.idtdna.com](http://www.idtdna.com)).

5

## 1 Relationship of the proposed three modes

2 In this assay, we proposed a C-CRET process from HRP-mimicking DNAzyme-catalyzed  
3 luminol-H<sub>2</sub>O<sub>2</sub> to fluorescein and further to GO when HRP-mimicking DNAzyme/fluorescein was  
4 in a close proximity to GO surface. Accordingly, mode I was firstly fabricated by covalently  
5 immobilizing HRP-mimicking DNAzyme/fluorescein-labeled hairpin DNAs (hot-spot-generation  
6 probes) on magnetic GO (MGO), resulting in a signal “off” state due to the quenching of  
7 luminol/H<sub>2</sub>O<sub>2</sub>/HRP-mimicking DNAzyme/fluorescein CRET system by GO. Although mode I  
8 offered sensitive and selective strategy for miRNA detection through MGO-based C-CRET hot-  
9 spot generation, its major disadvantage was the irreversibility and irreproducibility of the substrate  
10 for practical sensor applications, making it usable only once. Therefore, a new reversible and  
11 regenerable C-CRET hot-spot-active substrate for miRNA detection was fabricated as mode II  
12 through strand displacement reaction (SDR). While mode II offered a means of C-CRET hot-spot  
13 generation for miRNA detection with reproducibility and reversibility, it still suffered from an  
14 intrinsic limitation of sequence-dependence of II-1 on target miRNA. That is, to achieve detection  
15 of different target miRNAs, the sequence of II-1 had to be changed according to the target  
16 sequences, which would not qualify as a general approach for hot-spot creation. The problem of  
17 sequence-dependence also occurred in mode I, in which the sequence of I-1 also had to be  
18 changed with targets. To overcome all problems mentioned, mode III through forming a triple-  
19 helix molecular switch structure was proposed, which had the advantages of not only  
20 reproducibility and reversibility but also sequence-independence of hairpin probes on MGO.  
21

1 **Calculation of the surface coverage of hairpin probe I-1 on MGO.** Firstly, the fluorescence  
2 calibration curve of hairpin probe I-1 (from  $1.0 \times 10^{-7}$  to  $1.0 \times 10^{-6}$  M) was prepared (Fig. S2). The  
3 surface coverage of hairpin probe I-1 on MGO was quantitatively evaluated from the differences  
4 of fluorescence intensities of DNA I-1 solution at  $\sim 518$  nm before and after its attachment on  
5 MGO as follows.

6 The concentration of DNA I-1 before attachment ( $C_0$ ) was  $C_0 = 2.857 \times 10^{-6}$  M

7 The concentration of DNA I-1 after attachment ( $C_1$ ) was  $C_1 = 8.875 \times 10^{-8}$  M

8 The volume of DNA I-1 solution ( $V$ ) was  $V = 1050 \mu\text{L}$

9 Thus, the moles of total DNA I-1 attached on MGO ( $N$ ) were  $N = (C_0 - C_1) \times V = (2.857 \times 10^{-6} -$   
10  $8.875 \times 10^{-8}) \times 1050 \times 10^{-6} = 2.9 \times 10^{-9} \text{ mol}$

11 The specific surface area of GO was  $50 \text{ m}^2/\text{g}$

12 The volume and concentration of GO used to prepare the MGO were  $0.6 \text{ mL}$  and  $1 \text{ mg/mL}$ ,  
13 respectively.

14 Thus, the surface coverage of hairpin probe I-1 on MGO was  $2.9 \times 10^{-9} \text{ mol} / (0.6 \times 1 \times 10^{-3} \times 50$   
15  $\text{m}^2) = 9.6 \times 10^{-8} \text{ mol/m}^2 = 96 \text{ pmol/m}^2$ .

16

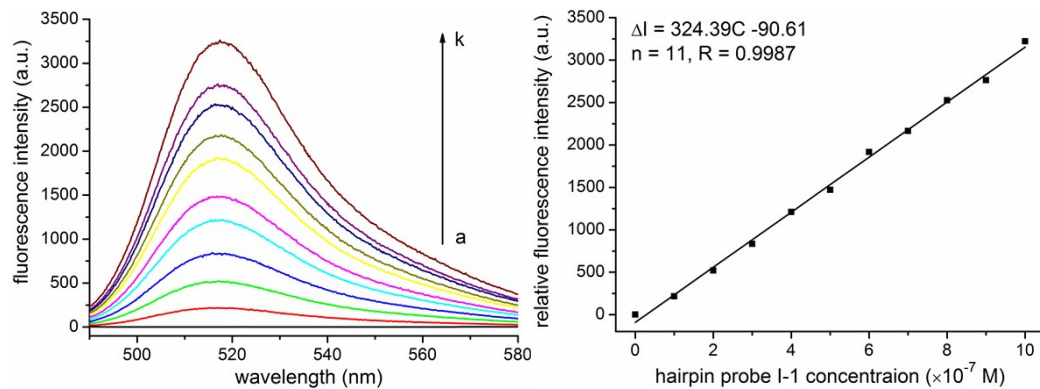

17

18 **Fig. S2.** Fluorescence intensities (A) and corresponding calibration curve (B) of standard hairpin  
19 probe I-1 solution with different. a→k:  $0$ ,  $1.0 \times 10^{-7}$ ,  $2.0 \times 10^{-7}$ ,  $3.0 \times 10^{-7}$ ,  $4.0 \times 10^{-7}$ ,  $5.0 \times 10^{-7}$ ,  $6.0$   
20  $\times 10^{-7}$ ,  $7.0 \times 10^{-7}$ ,  $8.0 \times 10^{-7}$ ,  $9.0 \times 10^{-7}$ , and  $1.0 \times 10^{-6}$  M.

21

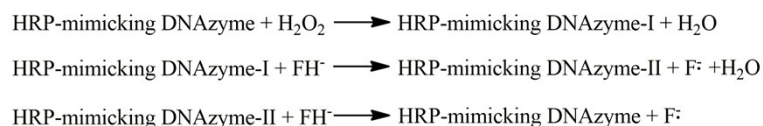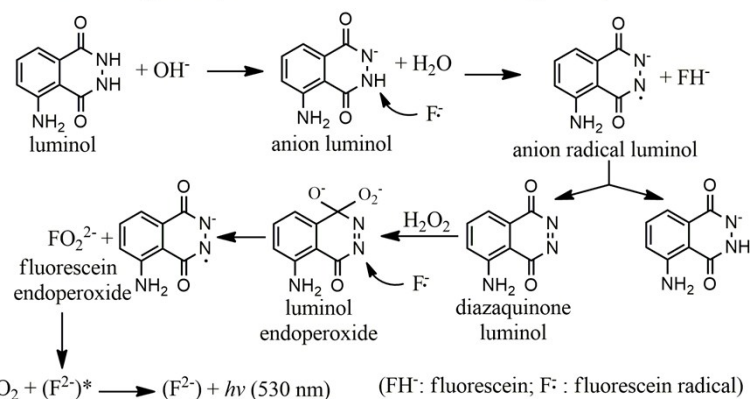

1

2 **Fig. S3.** CRET mechanism of luminol/H<sub>2</sub>O<sub>2</sub>/HRP-mimicking DNAzyme/fluorescein system. The

3 fluorescein radical (F<sup>·</sup>) increases the formation of the luminol radical (L<sup>·</sup>). After the formation of

4 luminol endoperoxide (LO<sub>2</sub><sup>2-</sup>), an energy transfer from LO<sub>2</sub><sup>2-</sup> to F<sup>·</sup> forms a fluorescein

5 endoperoxide (FO<sub>2</sub><sup>2-</sup>), simultaneously liberating oxygen and emitting luminescence at ~530 nm.

6

7

1 mode I'

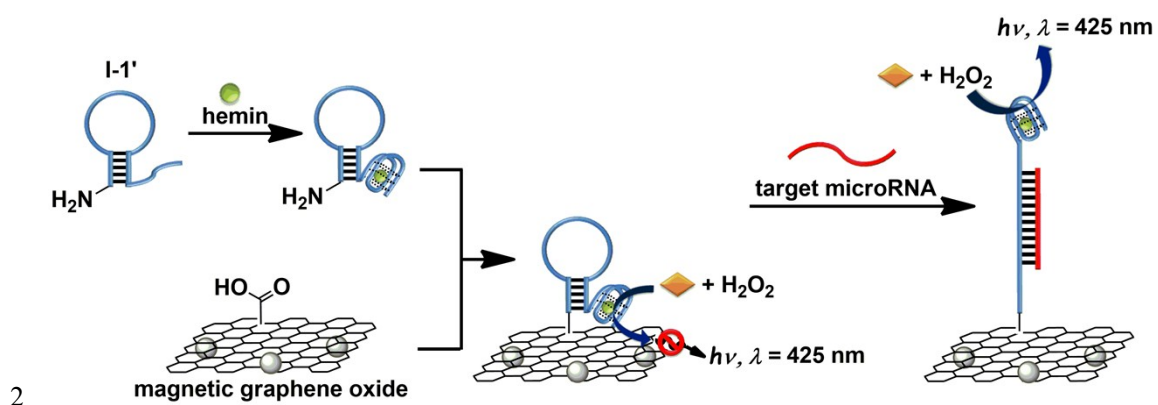

3 **Fig. S4.** Control experiment using hairpin probes I-1' that is only modified with HRP mimicking

4 DNAzyme (mode I) at 3'-end of I-1 to fabricate the hot-spot-substrate.

5

1 **Table S2.** Comparison between different modes for microRNA detection

| strategy | advantage                                                                                                                                     | disadvantage                                                                                                                                                                                                  |
|----------|-----------------------------------------------------------------------------------------------------------------------------------------------|---------------------------------------------------------------------------------------------------------------------------------------------------------------------------------------------------------------|
| mode I   | Only one hairpin DNA (I-1) was required.                                                                                                      | (i) The CRET hot-spot substrate was irreversible and not regenerable, making the sensor usable only once.<br>(ii) The sequence of hairpin DNA (I-1) on substrate had to be changed according to target miRNA. |
| mode II  | The fabricated CRET hot-spot substrate was reversible and regenerable.                                                                        | The sequence of hairpin DNA (II-1) on substrate had to be changed according to target miRNA.                                                                                                                  |
| mode III | (i) The fabricated CRET hot-spot substrate was reversible and regenerable.<br>(ii) Hairpin DNA (III-1) on substrate was sequence-independent. | All the disadvantages of modes I and II were successfully overcome.                                                                                                                                           |

2

### 3 **Advantages of the proposed strategy**

4 In comparison with earlier studies, the advantages of the proposed strategy can be summarized as  
5 follows. Firstly, the magnetic graphene oxide (MGO) was prepared via a carbodiimide-assisted  
6 covalent reaction using EDC as a coupling agent and NHS as an activator to active carboxyl  
7 groups on GO. The reaction was carried out at room temperature and easily operated. In contrast,  
8 most of the reported works for MGO preparation often involved with high temperature, nitrogen  
9 protection, complex chemical reactions, and complicated equipments.<sup>1-4</sup>

10 Secondly, due to the large specific surface and rich  $\pi$  electrons, GO can physically adsorb various  
11 biomolecules (such as DNA probes) with high affinity, while weak enough to allow quick  
12 desorption of probes in the presence of targets.<sup>5</sup> However, the physisorption system often suffered  
13 from no controllable organization, nonspecific displacement of probes by nontarget molecules and  
14 the false positive signal. To address this problem, herein we formed a C-CRET hot-spot-active  
15 substrate by covalently immobilizing hairpin DNA probes on GO via a carbodiimide-assisted  
16 covalent reaction. Upon target microRNA binding, the covalent hairpin probe only underwent a  
17 conformational change without leaving GO surface. As a result, the covalent substrate with good  
18 stability is more resistant to nonspecific probe release, which also supports the significance of not  
19 only controllable organization but also being reversible and regenerable,<sup>6,7</sup> especially through  
20 magnetic removal of reaction byproducts by the employment of MGO.

1 Thirdly, through theoretical calculations GO was a superquencher with long-range nanoscale  
2 energy transfer property.<sup>8,9</sup> In our work, instead of linear single-stranded DNA,<sup>10,11</sup> probes with  
3 hairpin structure covalently attached on MGO facilitated an efficient “on-off” signal switch for  
4 sensitive detection of microRNA target. In addition, unlike traditional CRET systems in which  
5 components were separated from each other and large bioenzyme molecules (e.g. HRP) were used  
6 as catalysts, in this assay we used HRP-mimicking DNAzyme as catalyst and integrated it with  
7 fluorescent dye into single DNA hairpin probe involving nucleic acid functionalization instead of  
8 complicated synthesis and modification of biomolecules.

9 Last but not least, in the proposed luminol/H<sub>2</sub>O<sub>2</sub>/HRP-mimicking DNAzyme/fluorescein/GO C-  
10 CRET system, the energy transfer efficiency from luminol to fluorescein was calculated as high as  
11 65.3%. In addition, in comparison with the luminol/H<sub>2</sub>O<sub>2</sub>/HRP-mimicking DNAzyme CL system,  
12 the total luminescence was enhanced ~2-fold for the luminol/H<sub>2</sub>O<sub>2</sub>/HRP-mimicking  
13 DNAzyme/fluorescein CRET system, which could be attributed to the enhancing role of  
14 fluorescein in the CRET system. That is, upon the addition of fluorescein into HRP-mimicking  
15 DNAzyme catalyzed luminol-H<sub>2</sub>O<sub>2</sub> CL system, the total emission was enhanced. Thus, fluorescein  
16 served as both acceptor of luminol and enhancer of this chemiluminescence (CL) system. The  
17 mechanism was summarized as Fig. 1.<sup>12</sup> Additionally, 3'-end of hairpin probes were  
18 functionalized with fluorescein, while G-quadruplex that intercalated with hemin to yield an active  
19 HRP-mimicking DNAzyme was also incorporated at 3'-end that was immediately adjacent to  
20 FAM, which also make a contribution to a high CRET efficiency.

21

## 22 References

- 23 1 X. Yang, X. Zhang, Y. Ma, Y. Huang, Y. Wang and Y. Chen, *J. Mater. Chem.*, 2009, **19**, 2710-  
24 2714.
- 25 2 X. Yang, Y. Wang, X. Huang, Y. Ma, Y. Huang, R. Yang, H. Duan and Y. Chen, *J. Mater.*  
26 *Chem.*, 2011, **21**, 3448-3454.
- 27 3 D. Tang, J. Tang, Q. Li, B. Su and G. Chen, *Anal. Chem.*, 2011, **83**, 7255-7259.
- 28 4 J. Shen, Y. Hu, M. Shi, N. Li, H. Ma and M. Ye, *J. Phys. Chem. C*, 2010, **114**, 1498-1503.
- 29 5 Z. S. Qian, X. Y. Shan, L. J. Chai, J. J. Ma, J. R. Chen and H. Feng, *Nanoscale*, 2014, **6**, 5671-  
30 5674.



- 1 6 Z. Liu, S. Chen, B. Liu, J. Wu, Y. Zhou, L. He, J. Ding and J. Liu, *Anal. Chem.*, doi:  
2 10.1021/ac503358m.
- 3 7 P.-J. J. Huang and J. Liu, *Anal. Chem.*, 2012, **84**, 4192-4198.
- 4 8 R. S. Swathi and K. L. Sebastian, *J. Chem. Phys.*, 2008, **129**, 054703.
- 5 9 R. S. Swathi and K. L. Sebastian, *J. Chem. Phys.*, 2009, **130**, 086101.
- 6 10 E. Dubuisson, Z. Yang and K. P. Loh, *Anal. Chem.*, 2011, **83**, 2452-2460.
- 7 11 P.-J. J. Huang and J. Liu, *Small*, 2012, **8**, 977-983.
- 8 12 S. Zhang, Y. Yan and S. Bi, *Anal. Chem.*, 2009, **81**, 8695-8701.
